# Supplementary material for: Real-World Experience With Ceftazidime-Avibactam for Multidrug-Resistant Gram-Negative Bacterial Infections
Source: PubMed Central journal article supplement — Open Forum Infect Dis. 2019 Dec 6;6(12):ofz522. doi: 10.1093/ofid/ofz522 (PMC6934163; doi:10.1093/ofid/ofz522), 2019-12-06
Supplement: ofz522_suppl_supplementary_material.pdf [file ofz522_suppl_supplementary_material.pdf]

Supplementary Appendix 1

Carbapenem-resistant *Klebsiella pneumoniae* antibiogram

| Organism                                                                                                                                                                                                      | Percent susceptible <sup>a</sup> |               |               |                |               |               |
|---------------------------------------------------------------------------------------------------------------------------------------------------------------------------------------------------------------|----------------------------------|---------------|---------------|----------------|---------------|---------------|
|                                                                                                                                                                                                               | Ceftazidime-<br>avibactam        | Amikacin      | Gentamicin    | Colistin       | Tigecycline   | Meropenem     |
| CR- <i>K. pneumoniae</i>                                                                                                                                                                                      | 96.0%<br>N=50                    | 66.7%<br>N=33 | 65.7%<br>N=70 | 100.0%<br>N=44 | 64.4%<br>N=45 | 14.5%<br>N=62 |
| <p>a. Clinical and Laboratory Standards Institute (CLSI) 2019 breakpoints used for all antibiotics except colistin for which the EUCAST breakpoint of 2 mg/mL was applied</p> <p>CR: carbapenem-resistant</p> |                                  |               |               |                |               |               |

*Pseudomonas aeruginosa* antibiogram

| Organism | Percent susceptible <sup>a</sup> |                            |          |            |             |                             |           |
|----------|----------------------------------|----------------------------|----------|------------|-------------|-----------------------------|-----------|
|          | Ceftazidime-<br>avibactam        | Ceftolozane-<br>tazobactam | Amikacin | Tobramycin | Ceftazidime | Piperacillin-<br>tazobactam | Meropenem |

|                                                                                                 |       |       |       |       |       |       |       |
|-------------------------------------------------------------------------------------------------|-------|-------|-------|-------|-------|-------|-------|
| <i>Pseudomonas</i>                                                                              | 92.6% | 85.2% | 94.0% | 78.0% | 52.5% | 28.0% | 22.5% |
| <i>aeruginosa</i>                                                                               | N=27  | N=27  | N=50  | N=50  | N=40  | N=50  | N=49  |
| a. Clinical and Laboratory Standards Institute (CLSI) 2019 breakpoints used for all antibiotics |       |       |       |       |       |       |       |

Supplementary Appendix 2

Univariate analyses for clinical failure

|                                      | <b>Clinical success<sup>a</sup></b><br><b>N=144</b> | <b>Clinical failure<sup>a</sup></b><br><b>N=59</b> | <b>Odds ratio (95% CI)</b> | <b>P value</b> |
|--------------------------------------|-----------------------------------------------------|----------------------------------------------------|----------------------------|----------------|
| Age, years                           |                                                     |                                                    | 0.989 (0.972, 1.008)       | 0.251          |
| Age ≥ 65 years                       | 69 (47.9)                                           | 21 (35.6)                                          | 0.601 (0.321, 1.122)       | 0.109          |
| Male gender                          | 80 (55.6)                                           | 31 (52.5)                                          | 0.886 (0.482, 1.626)       | 0.695          |
| African American                     | 61 (42.4)                                           | 32 (54.2)                                          | 1.613 (0.877, 2.967)       | 0.123          |
| BMI                                  |                                                     |                                                    | 1.025 (0.994, 1.057)       | 0.118          |
| Obese (BMI ≥ 30 kg/m <sup>2</sup> )  | 51 (35.4)                                           | 26 (44.1)                                          | 1.437 (0.775, 2.663)       | 0.249          |
| Estimated CrCl (mL/min) <sup>a</sup> |                                                     |                                                    |                            |                |
| CrCl ≤ 30 mL/min                     | 26 (18.1)                                           | 14 (23.7)                                          | 1.615 (0.552, 4.729)       | 0.382          |
| CrCl 31-50 mL/min                    | 24 (16.7)                                           | 4 (6.8)                                            | 0.500 (0.128, 1.950)       | 0.318          |
| CrCl 51-90 mL/min                    | 36 (25.0)                                           | 14 (23.7)                                          | 1.167 (0.406, 3.350)       | 0.775          |
| CrCl 91 – 130 mL/min                 | 21 (14.6)                                           | 7 (11.9)                                           | Reference                  | ---            |
| CrCl > 130 mL/min                    | 20 (13.9)                                           | 7 (11.9)                                           | 1.050 (0.312, 3.533)       | 0.937          |

|                                          |           |           |                      |       |
|------------------------------------------|-----------|-----------|----------------------|-------|
| Hemodialysis                             | 17 (11.8) | 13 (22.0) | 2.294 (0.749, 7.027) | 0.146 |
| CrCl $\leq$ 30 mL/min or<br>hemodialysis | 43 (29.9) | 27 (45.8) | 1.982 (1.062, 3.700) | 0.030 |
| <b>Residence prior to<br/>admission</b>  |           |           |                      |       |
| Community                                | 74 (51.4) | 27 (45.8) | Reference            | ---   |
| SNF/LTAC                                 | 47 (32.6) | 18 (30.5) | 1.050 (0.521, 2.113) | 0.892 |
| Transferred from<br>outside hospital     | 16 (11.1) | 12 (20.3) | 2.056 (0.862, 4.899) | 0.104 |
| Other                                    | 7 (4.9)   | 2 (3.4)   | 0.783 (0.153, 4.005) | 0.769 |
| <b>Comorbid conditions</b>               |           |           |                      |       |
| Diabetes                                 | 60 (41.7) | 25 (42.4) | 1.029 (0.557, 1.901) | 0.926 |
| Heart Failure                            | 25 (17.4) | 12 (20.3) | 1.215 (0.565, 2.616) | 0.618 |
| Chronic kidney<br>disease                | 41 (28.5) | 24 (40.7) | 1.723 (0.915, 3.244) | 0.091 |

|                                                          |            |           |                      |       |
|----------------------------------------------------------|------------|-----------|----------------------|-------|
| Chronic lung disease                                     |            |           |                      |       |
| Malignancy                                               | 15 (10.4)  | 6 (10.2)  | 0.974 (0.358, 2.645) | 0.958 |
| Liver disease                                            | 20 (13.9)  | 7 (11.9)  | 0.835 (0.333, 2.094) | 0.700 |
| Charlson Comorbidity score                               |            |           | 1.051 (0.947, 1.168) | 0.349 |
| Charlson Comorbidity score > 4                           | 57 (39.6)  | 28 (47.5) | 1.379 (0.749, 2.538) | 0.302 |
| Immunocompromised                                        | 13 (9.0)   | 9 (15.3)  | 1.814 (0.730, 4.507) | 0.195 |
| MDRO infection or colonization within 1 year             | 70 (48.6)  | 27 (45.8) | 0.892 (0.486, 1.638) | 0.712 |
| Recent antibiotic exposure ( $\geq$ 24 h within 90 days) | 108 (75.0) | 49 (83.1) | 1.633 (0.750, 3.555) | 0.213 |
| Recent hospitalization ( $\geq$ 48 hours within 90 days) | 101 (70.1) | 50 (84.7) | 2.365 (1.069, 5.234) | 0.030 |
| Recent surgery (within 30 days)                          | 28 (19.4)  | 10 (16.9) | 0.845 (0.382, 1.873) | 0.679 |
| ICU at index culture                                     | 62 (43.1)  | 40 (67.8) | 2.784 (1.471, 5.270) | 0.001 |

|                                                      |           |           |                      |         |
|------------------------------------------------------|-----------|-----------|----------------------|---------|
| SOFA score                                           |           |           | 1.264 (1.155, 1.385) | < 0.001 |
| Hospital-acquired infection                          | 74 (51.4) | 43 (72.9) | 2.542 (1.313, 4.921) | 0.005   |
| Infection Source                                     |           |           |                      |         |
| Primary bacteremia                                   | 3 (2.1)   | 7 (11.9)  |                      |         |
| Respiratory                                          | 44 (30.6) | 32 (54.2) |                      |         |
| Intra-abdominal                                      | 33 (22.9) | 5 (8.5)   |                      |         |
| Skin and soft tissue                                 | 13 (9.0)  | 5 (8.5)   |                      |         |
| Osteoarticular                                       | 12 (8.3)  | 2 (3.4)   |                      |         |
| Urine                                                | 34 (23.6) | 6 (10.2)  |                      |         |
| Prosthetic device                                    | 2 (1.4)   | 0         |                      |         |
| Intravenous catheter                                 | 2 (1.4)   | 2 (3.4)   |                      |         |
| Other                                                | 1 (0.7)   | 0         |                      |         |
| Primary bacteremia or<br>respiratory tract infection | 47 (32.6) | 39 (66.1) | 4.024 (2.118, 7.646) | < 0.001 |
| Positive blood cultures                              | 13 (9.0)  | 9 (15.3)  | 1.814 (0.730, 4.507) | 0.195   |
| Secondary bacteremia                                 | 10 (6.9)  | 2 (3.4)   | 0.470 (0.100, 2.214) | 0.515   |

|                                                                                   |            |            |                      |       |
|-----------------------------------------------------------------------------------|------------|------------|----------------------|-------|
| CRE                                                                               | 83 (57.6)  | 34 (57.6)  | 1.000 (0.541, 1.845) | 0.999 |
| <i>Pseudomonas</i> spp.                                                           | 44 (30.6)  | 19 (32.2)  | 1.080 (0.563, 2.070) | 0.818 |
| Polymicrobial infection                                                           | 34 (23.6)  | 14 (23.7)  | 1.007 (0.494, 2.052) | 0.986 |
| <b>Treatment information</b>                                                      |            |            |                      |       |
| Infectious disease consult                                                        | 140 (97.2) | 59 (100.0) | 1.421 (1.299, 1.556) | 0.325 |
| Time to infectious diseases consult <sup>b</sup>                                  |            |            | 1.000 (0.999, 1.001) | 0.674 |
|                                                                                   |            |            |                      |       |
| Infectious diseases consult $\leq$ 48 hours after culture collection <sup>b</sup> | 96 (68.6)  | 40 (67.8)  | 0.965 (0.503, 1.853) | 0.915 |
| Surgical consult                                                                  | 42 (29.2)  | 16 (27.1)  | 0.904 (0.459, 1.779) | 0.769 |
| Source control pursued                                                            | 44 (30.6)  | 10 (16.9)  | 0.464 (0.215, 0.999) | 0.046 |
| Active antibiotic(s) before CZA                                                   | 38 (26.4)  | 16 (27.1)  | 1.038 (0.524, 2.005) | 0.915 |

|                                                                                             |            |           |                      |       |
|---------------------------------------------------------------------------------------------|------------|-----------|----------------------|-------|
| Time to active antibiotic(s)<br>(hours)                                                     |            |           | 1.000 (0.998, 1.002) | 0.682 |
| Active antibiotic therapy $\leq$ 48<br>hours after culture collection                       | 71 (49.3)  | 20 (33.9) | 0.527 (0.281, 0.990) | 0.045 |
| Time to CZA (h)                                                                             |            |           | 1.001 (0.999, 1.002) | 0.603 |
| CZA within 48 hour                                                                          | 48 (33.3)  | 11 (18.6) | 0.458 (2.18, 0.962)  | 0.036 |
| CZA within 72 hours                                                                         | 64 (44.4)  | 23 (39.0) | 0.799 (0.431, 1.481) | 0.475 |
| CZA within 96 hours                                                                         | 83 (57.6)  | 29 (49.2) | 0.710 (0.387, 1.305) | 0.270 |
| CZA within 120 hours                                                                        | 100 (69.4) | 36 (61.0) | 0.689 (0.366, 1.296) | 0.246 |
| Combination IV antibiotic<br>therapy with CZA                                               | 44 (30.6)  | 24 (40.7) | 1.558 (0.831, 2.923) | 0.165 |
| Inhaled antibiotic therapy                                                                  | 10 (6.9)   | 11 (18.6) | 3.071 (1.227, 7.687) | 0.013 |
| CZA renal dose adjustment                                                                   | 61 (42.4)  | 31 (52.5) | 1.506 (0.820, 2.769) | 0.186 |
| <p>a. All values represent number (%) or median (interquartile range)</p> <p>b. N = 199</p> |            |           |                      |       |



BMI: body mass index; CI: confidence interval; CRE: carbapenem-resistant Enterobacteriaceae; CrCl: creatinine clearance; CZA: ceftazidime-avibactam; ICU: intensive care unit; LTAC: long-term acute care hospital; MDRO: multidrug-resistant organism; SOFA: Sequential Organ Failure Assessment; SNF: skilled nursing facility
